# Supplementary material for: Eating behaviours, menstrual history and the athletic career: a retrospective survey from adolescence to adulthood in female endurance athletes
Source: PubMed Central journal article supplement — BMJ Open Sport Exerc Med. 2023 Mar 2;9(1):e001489. doi: 10.1136/bmjsem-2022-001489 (PMC9990674; doi:10.1136/bmjsem-2022-001489), 2023-03-02
Supplement: bmjsem-2022-001489supp001.pdf [file bmjsem-2022-001489supp001.pdf]

Supplemental table 1. Associations of eating behaviours at ages 13–15, 16–18, and 19–21 and menstrual history with sports career length, participation level, injury-related harms during the sports career, and sports career termination due to an injury.

| <i>Sports career length (n = 100)</i>                            |              |                     |                   |
|------------------------------------------------------------------|--------------|---------------------|-------------------|
|                                                                  | B            | 95% CI              | P-value           |
| Primary amenorrhea                                               | 2.49         | -0.14, 5.12         | 0.063             |
| Secondary amenorrhea                                             | -0.03        | -1.74, 1.68         | 0.972             |
| EDE-QS                                                           | <b>-0.19</b> | <b>-0.28, -0.11</b> | <b>&lt; 0.001</b> |
| Time (age 16-18 vs. age 13-15)                                   | 0.43         | -1.63, 2.49         | 0.684             |
| Time (age 19-21 vs. age 13-15)                                   | 0.66         | -1.41, 2.73         | 0.531             |
| <i>Participation level (international vs national) (n = 100)</i> |              |                     |                   |
|                                                                  | OR           | 95% CI              | P-value           |
| Primary amenorrhea                                               | 1.11         | 0.57, 2.14          | 0.762             |
| Secondary amenorrhea                                             | 0.62         | 0.35, 1.11          | 0.106             |
| EDE-QS                                                           | 0.98         | 0.94, 1.02          | 0.261             |
| Time (age 16-18 vs age 13-15)                                    | 1.04         | 0.56, 1.96          | 0.887             |
| Time (age 19-21 vs age 13-15)                                    | 1.01         | 0.54, 1.90          | 0.978             |
| <i>Injury-related harms during the sports career (n = 100)</i>   |              |                     |                   |
|                                                                  | OR           | 95% CI              | P-value           |
| Primary amenorrhea                                               | 1.17         | 0.52, 2.62          | 0.704             |
| Secondary amenorrhea                                             | <b>3.55</b>  | <b>1.73, 7.27</b>   | <b>&lt; 0.001</b> |
| EDE-QS                                                           | 0.96         | 0.92, 1.00          | 0.076             |
| Time (age 16-18 vs age 13-15)                                    | 1.08         | 0.47, 2.50          | 0.850             |
| Time (age 19-21 vs age 13-15)                                    | 1.11         | 0.48, 2.57          | 0.799             |
| <i>Sports career termination due to injury (n = 94)</i>          |              |                     |                   |
|                                                                  | OR           | 95% CI              | P-value           |
| Primary amenorrhea                                               | 0.54         | 0.28, 1.06          | 0.074             |
| Secondary amenorrhea                                             | <b>1.87</b>  | <b>1.06, 3.29</b>   | <b>0.030</b>      |
| EDE-QS                                                           | 1.01         | 0.97, 1.04          | 0.708             |
| Time (age 16-18 vs age 13-15)                                    | 0.98         | 0.53, 1.82          | 0.960             |
| Time (age 19-21 vs age 13-15)                                    | 1.03         | 0.55, 1.92          | 0.923             |

OR = odds ratio; CI = confidence interval; EDE-QS = the Eating Disorder Examination Questionnaire short form scores
